# Supplementary material
Source: PubMed Central journal article supplement (PMC4295002)
Supplement: NIHMS598217-supplement-1.pdf [file NIHMS598217-supplement-1.pdf]

# Supplementary Figure 1; Mungamuri et al., 2014

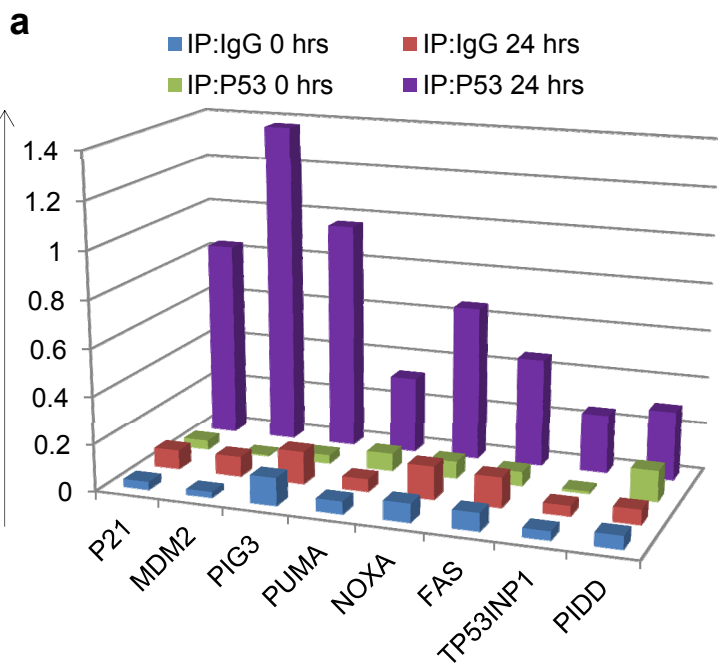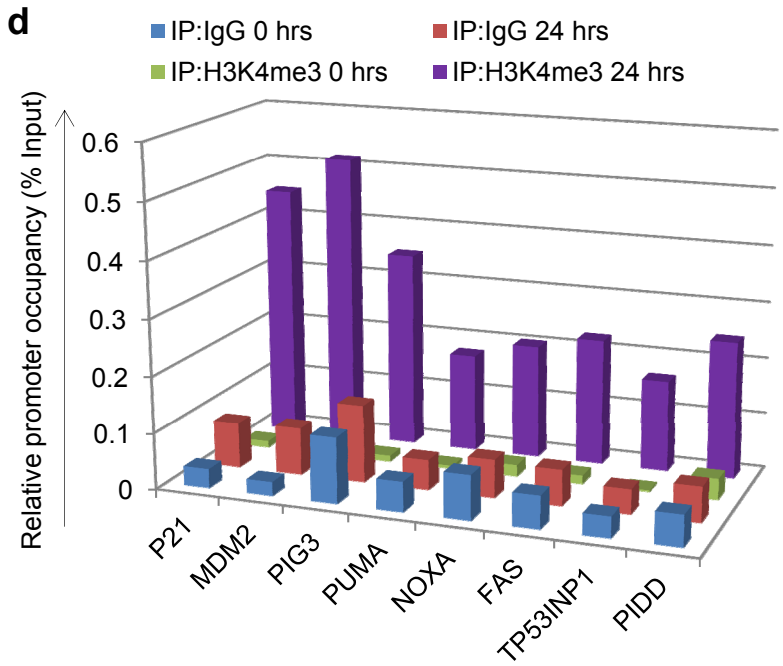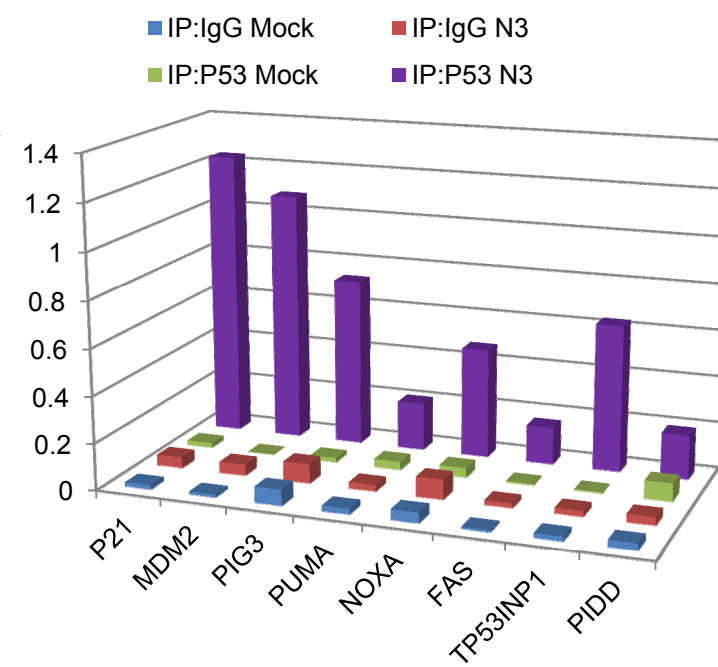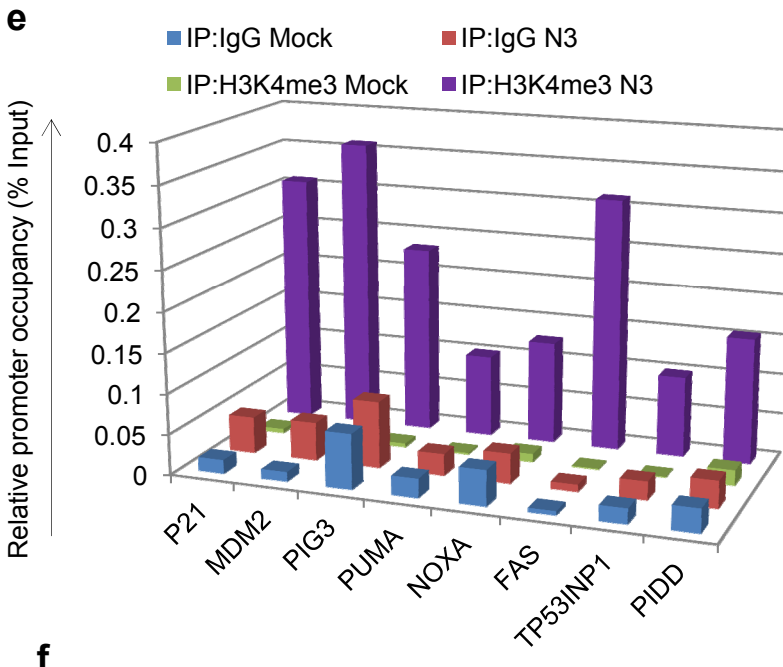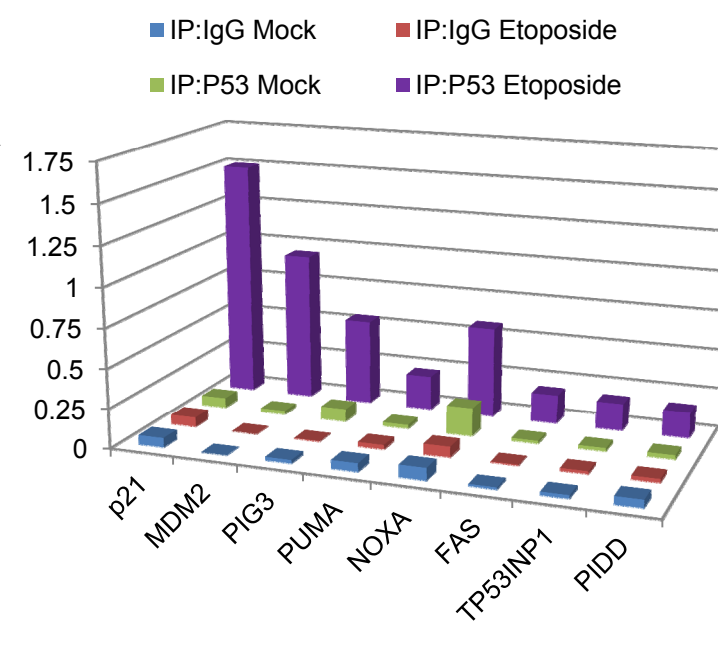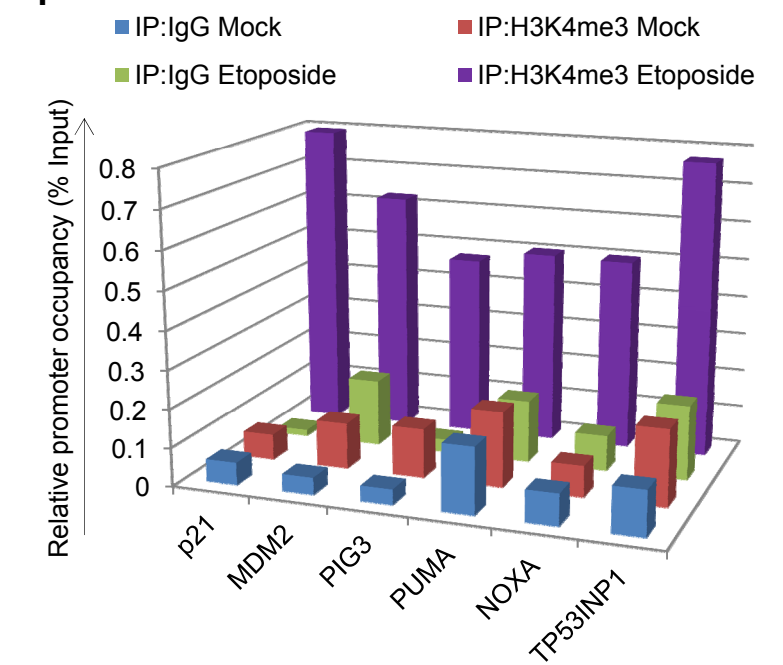

# Supplementary Figure 2; Mungamuri et al., 2014

**a**

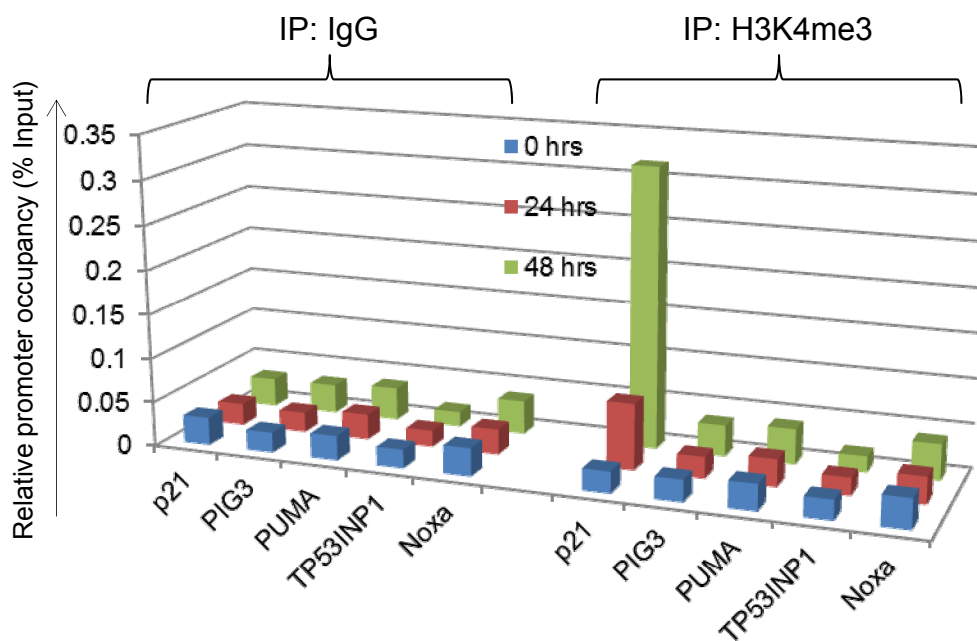

**b**

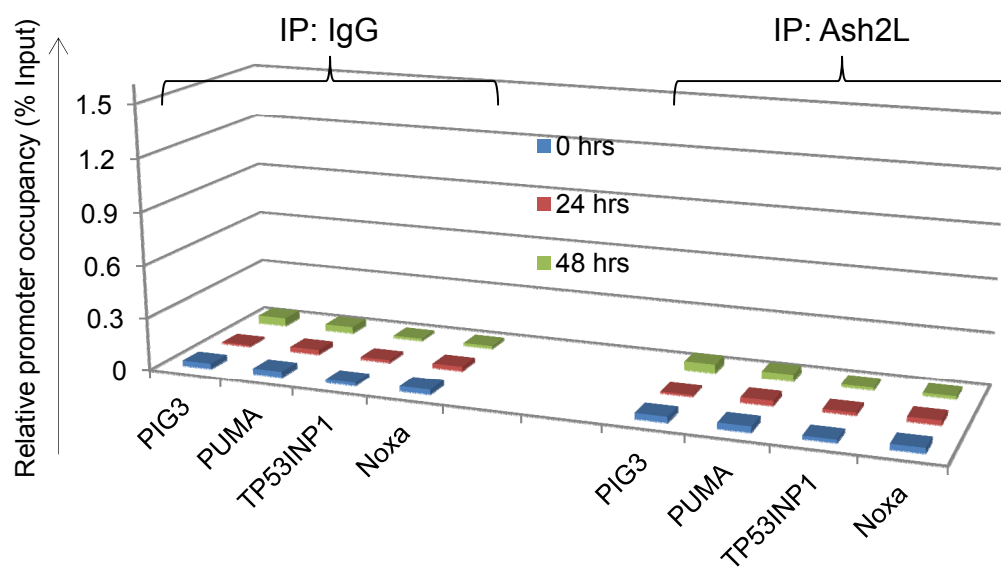

**a**

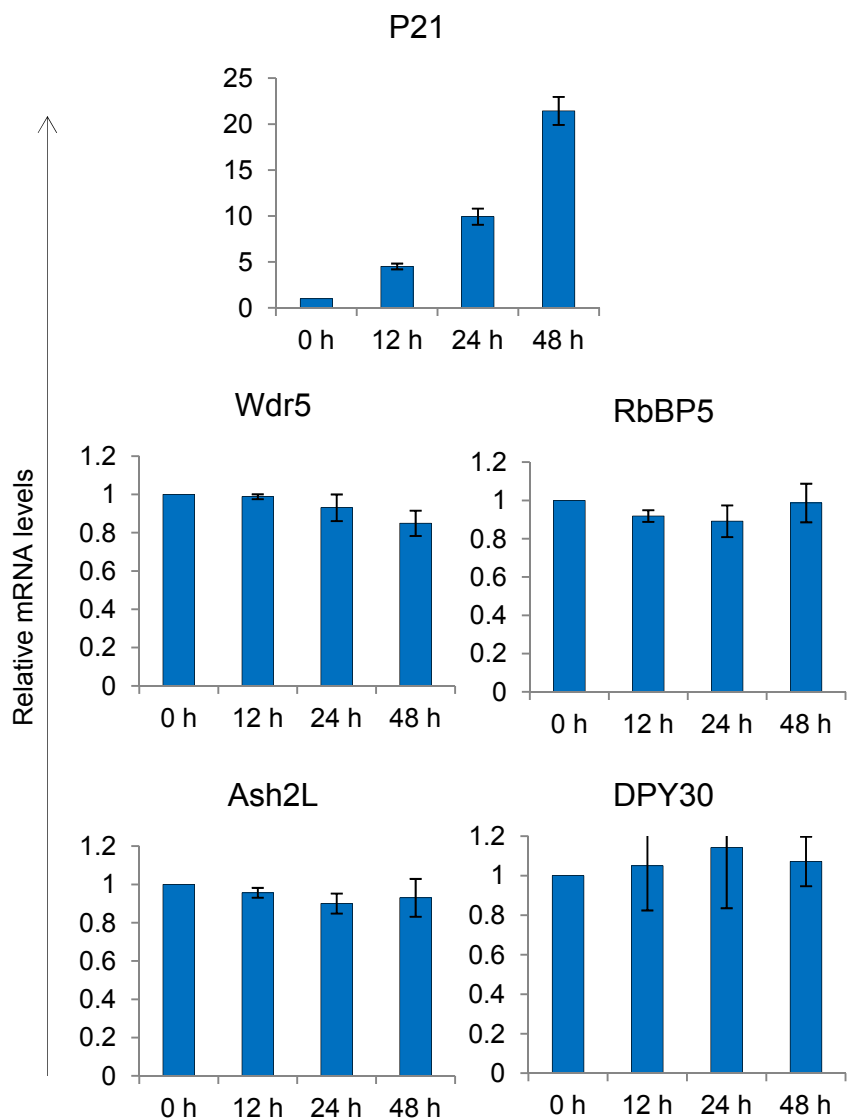

**b**

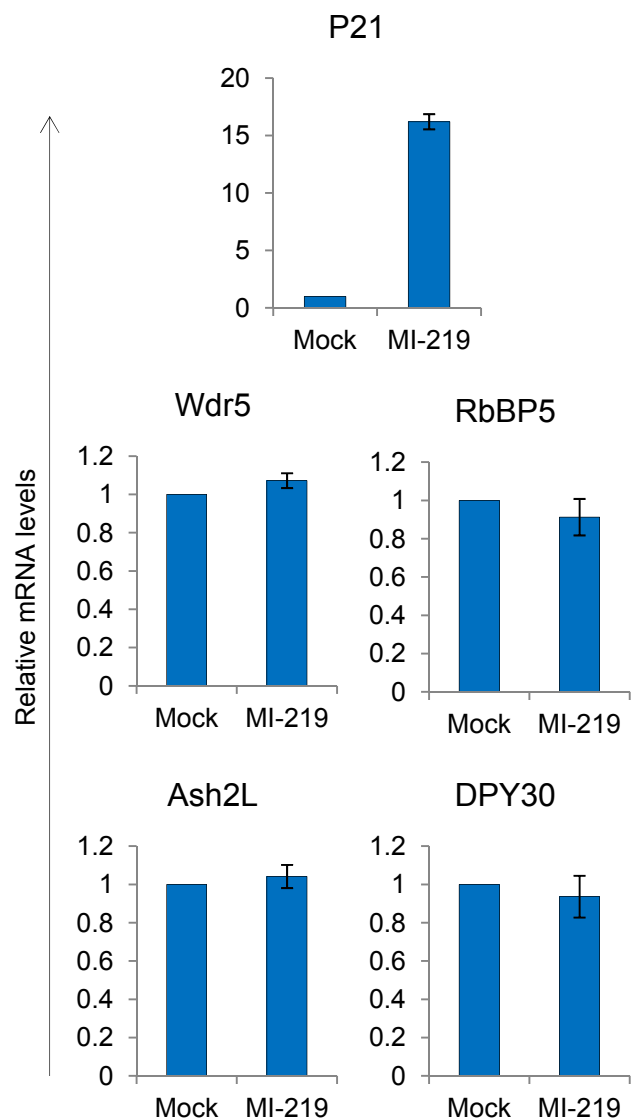

**c**

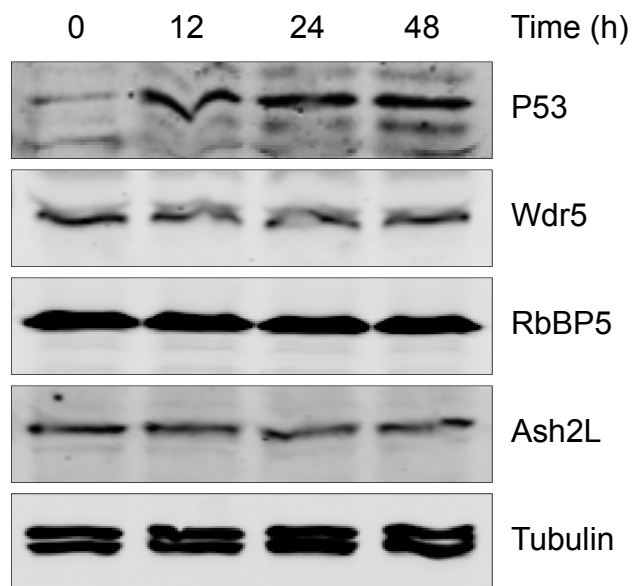

**d**

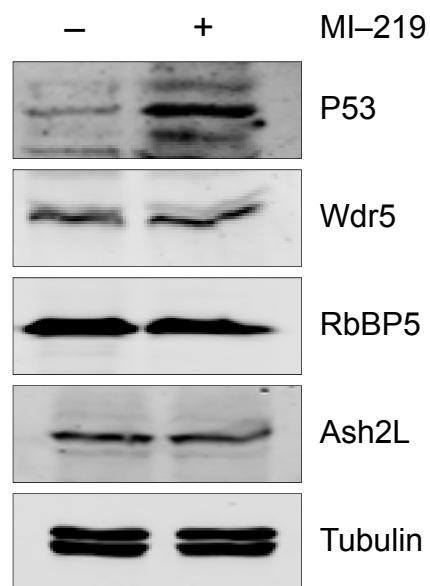

# Supplementary Figure 4; Mungamuri et al., 2014

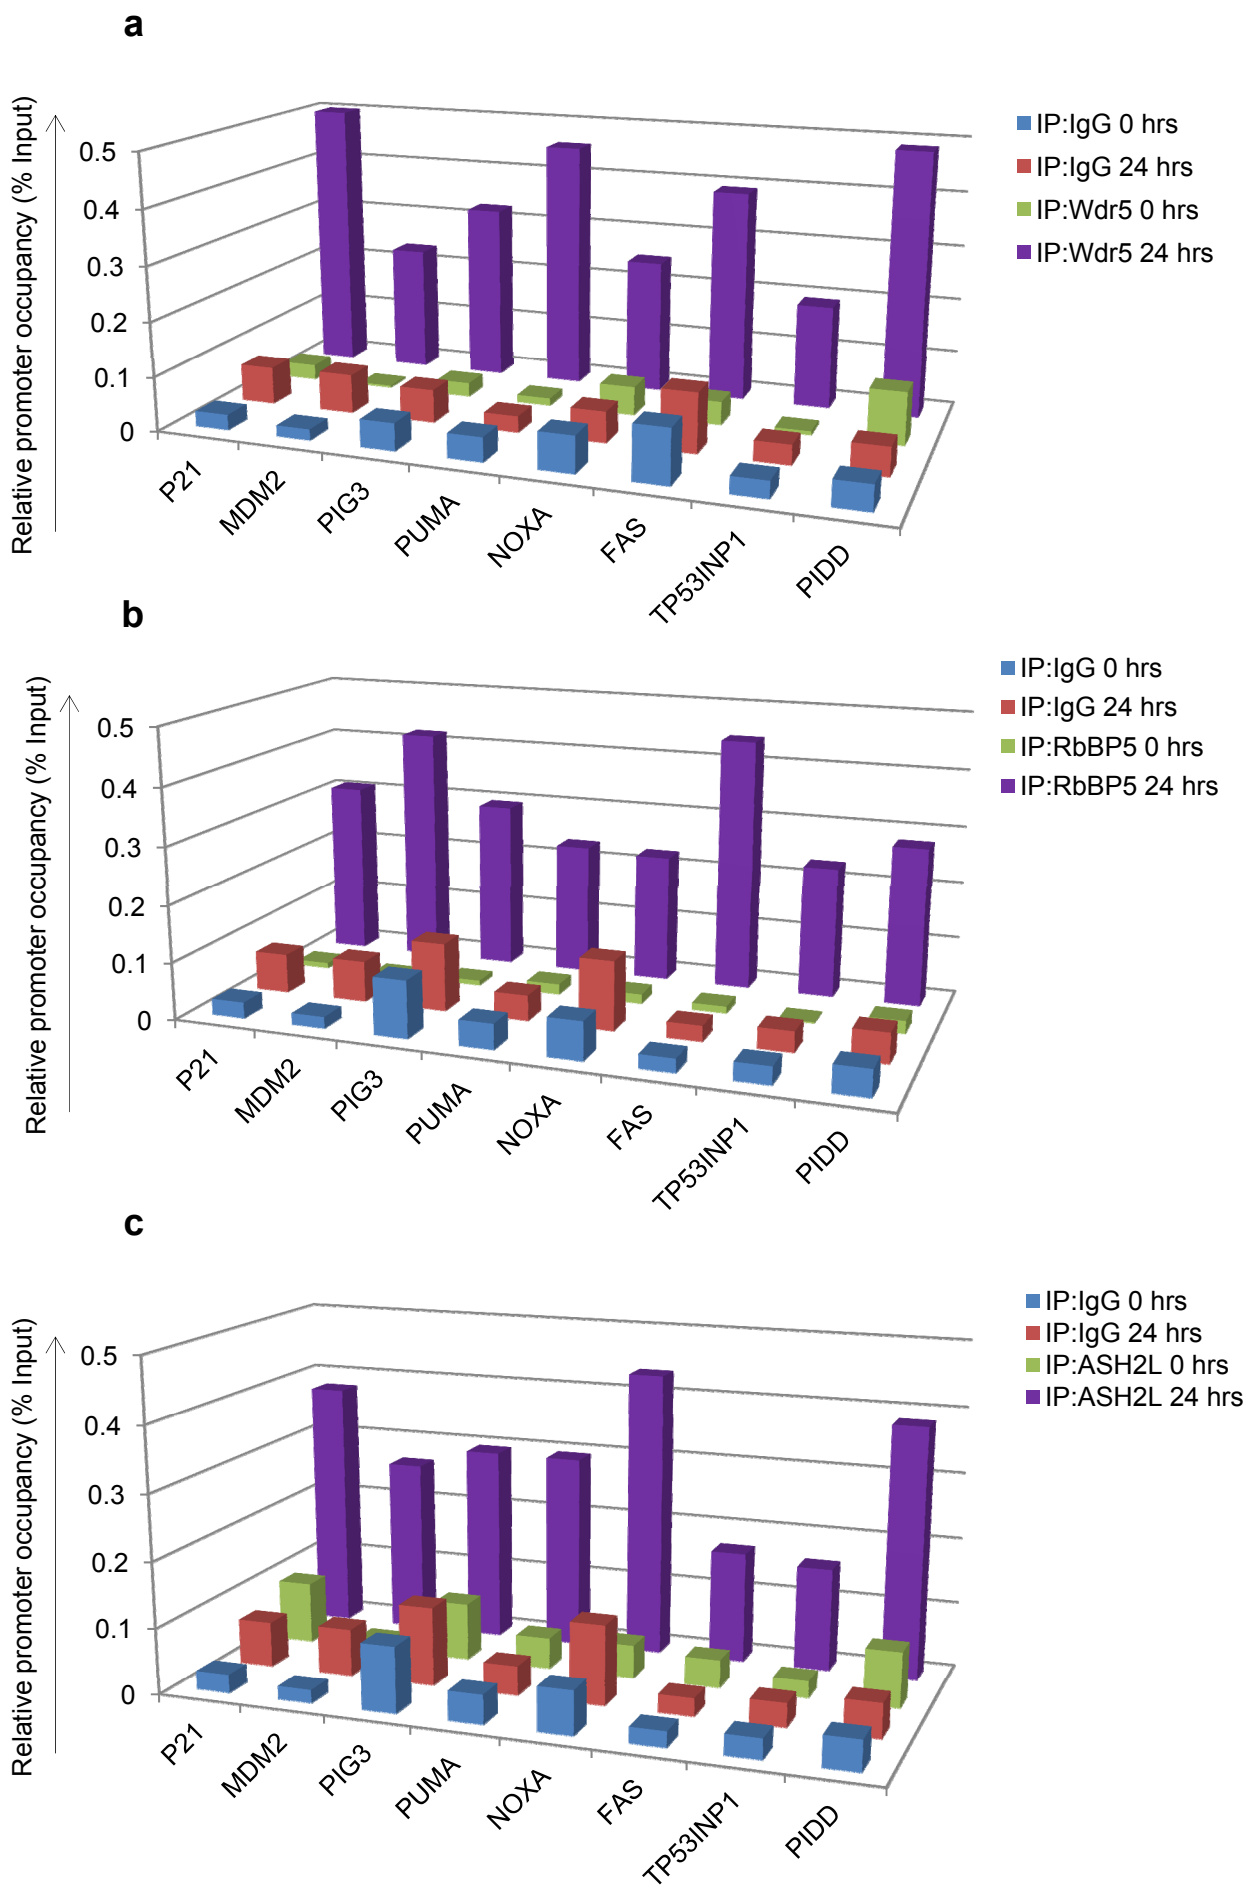

Supplementary Figure 5; Mungamuri et al., 2014

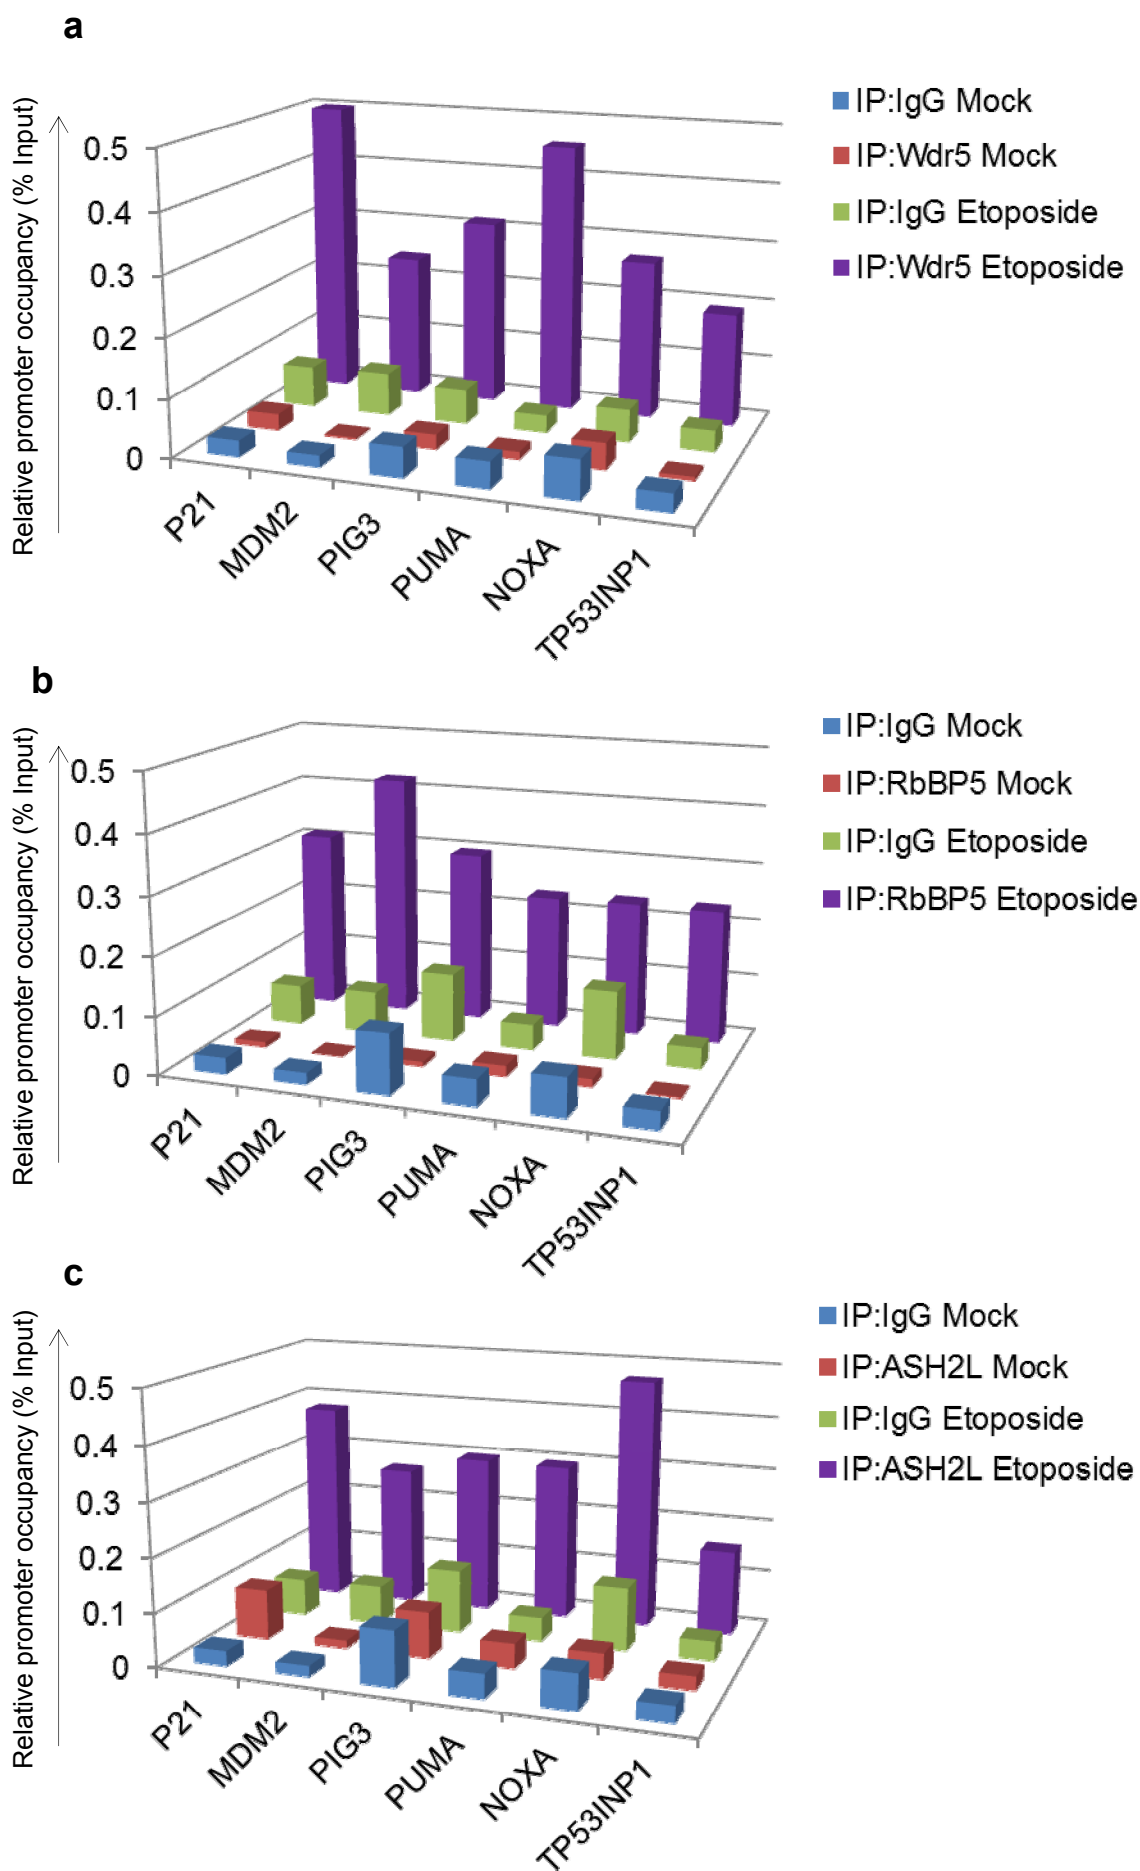

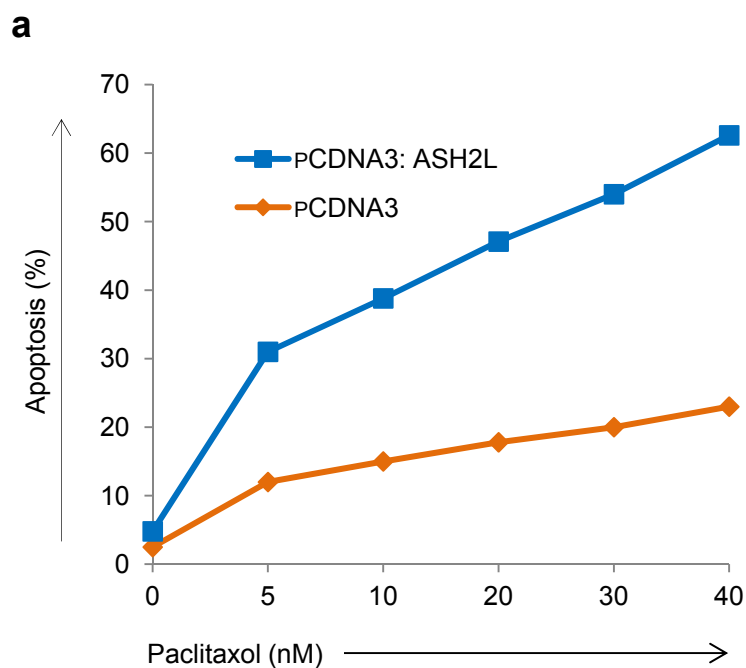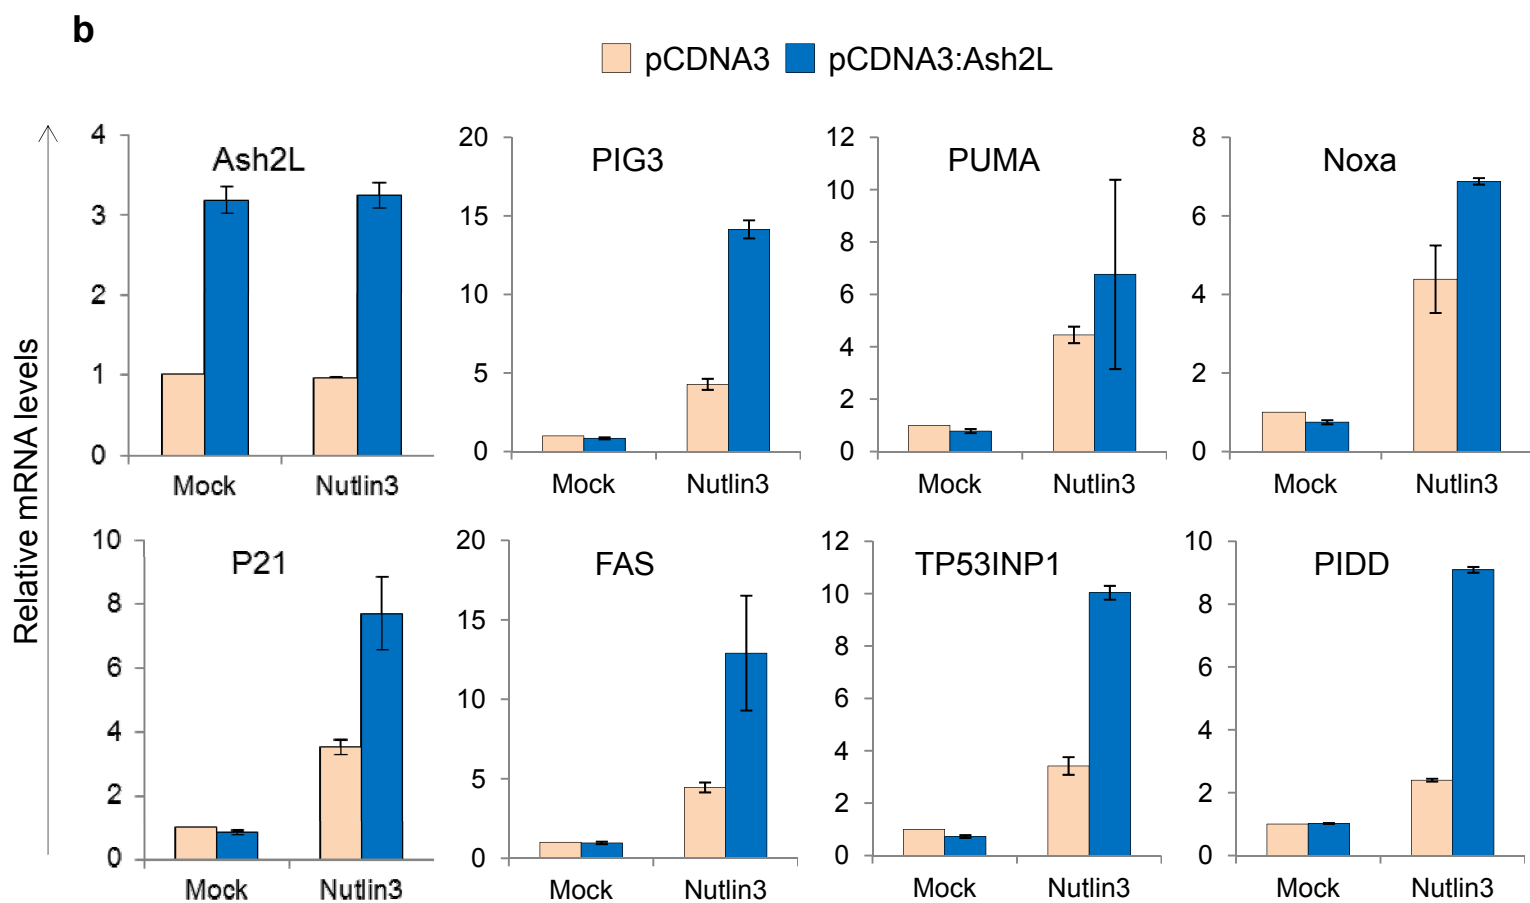

# Supplementary Figure 7; Mungamuri et al., 2014

**a**

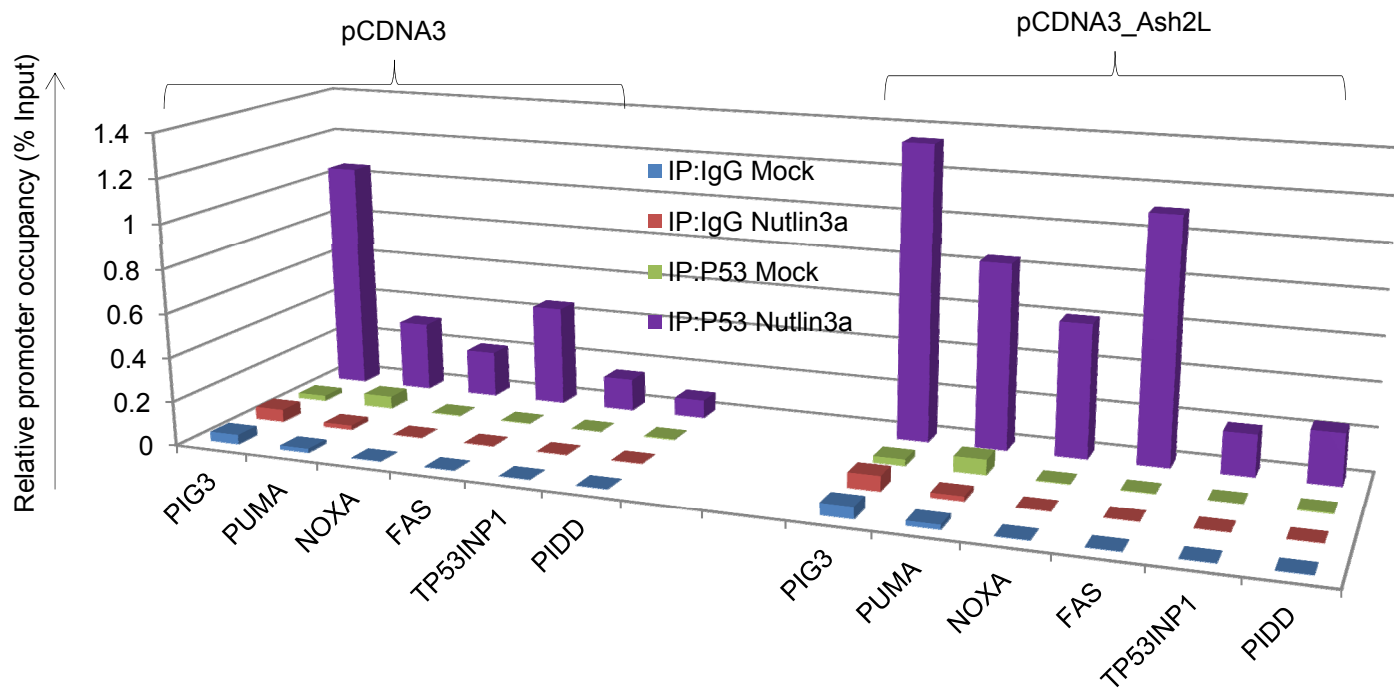

**b**

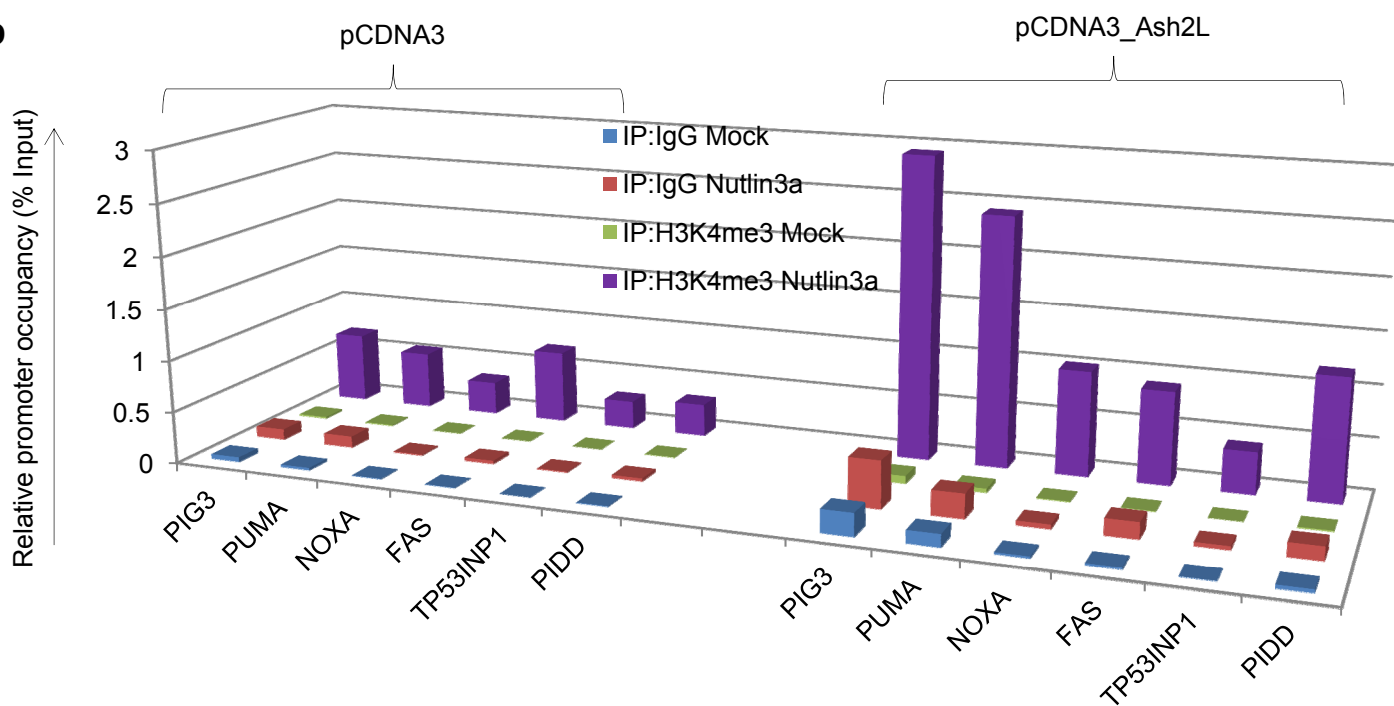

# Supplementary Figure 8; Mungamuri et al., 2014

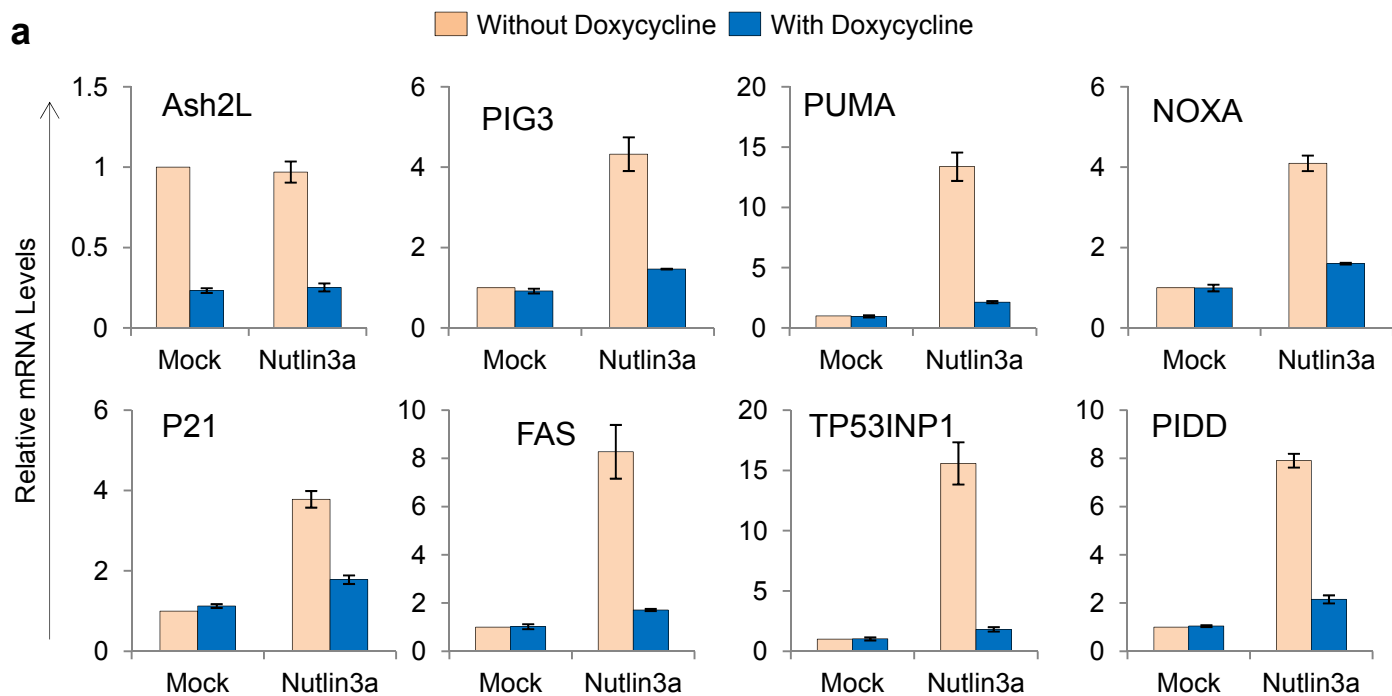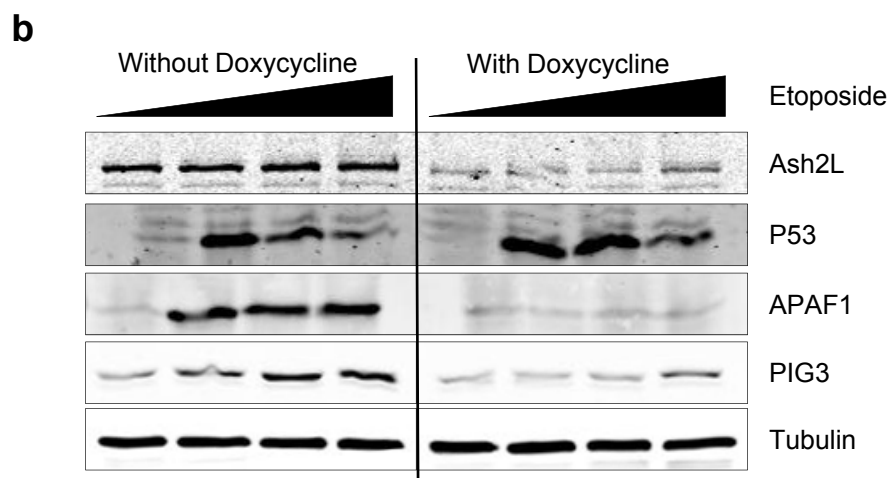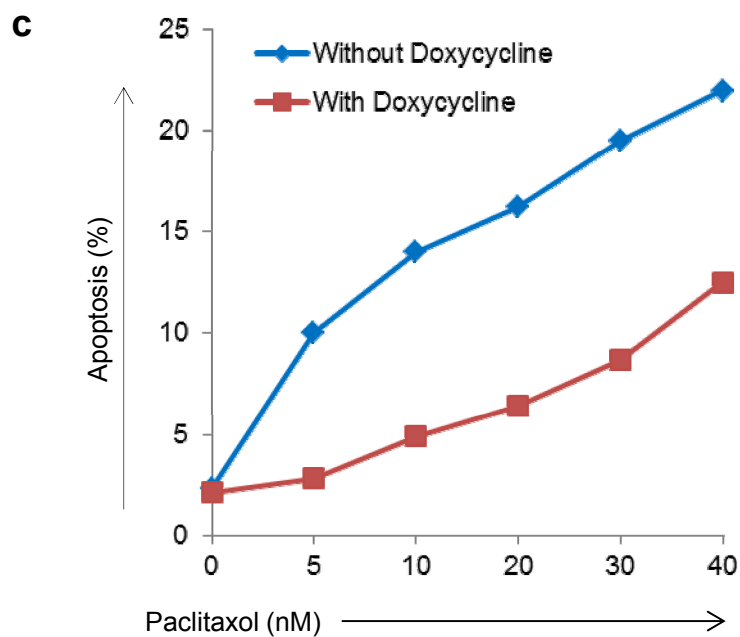



# Supplementary Figure 9; Mungamuri et al., 2014

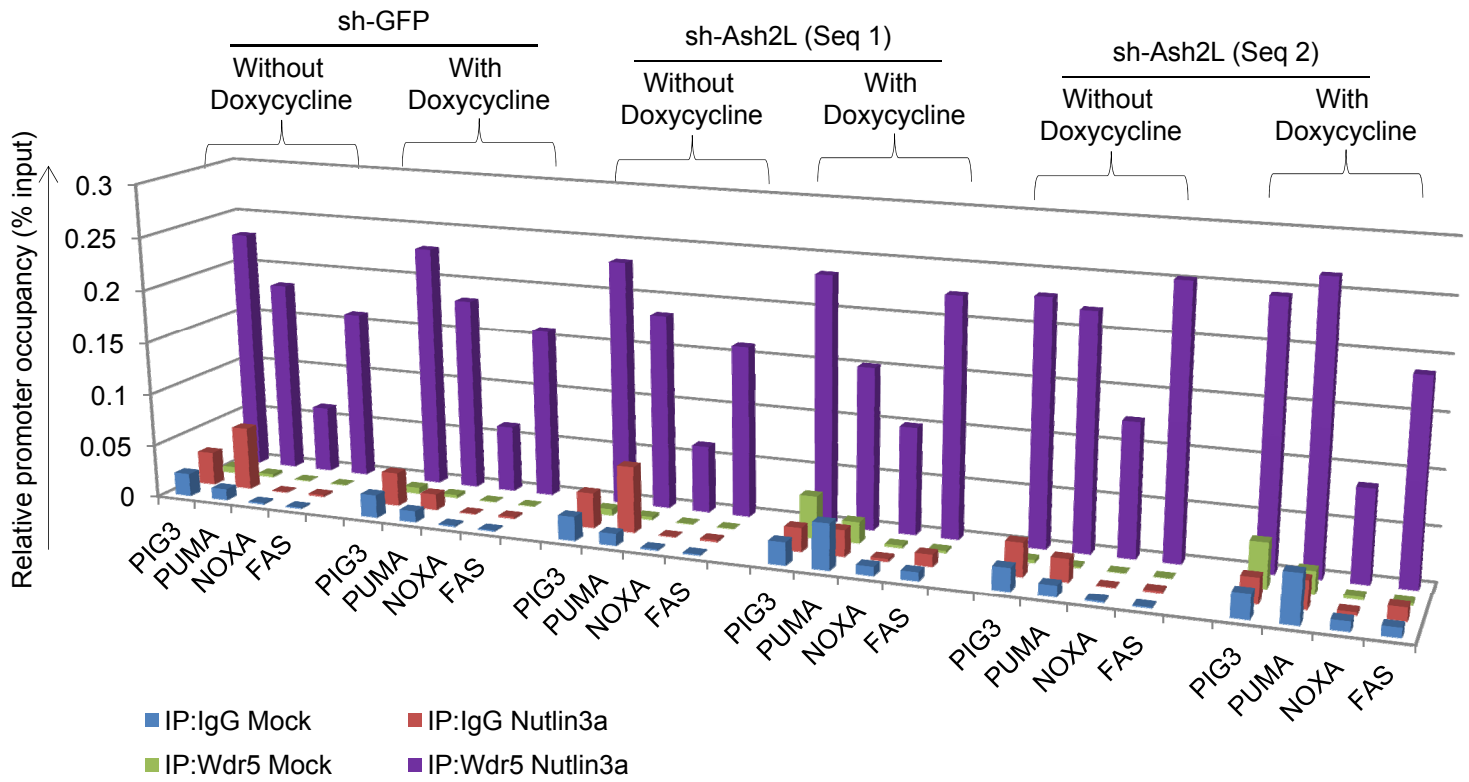

# Supplementary Figure 10; Mungamuri et al., 2014

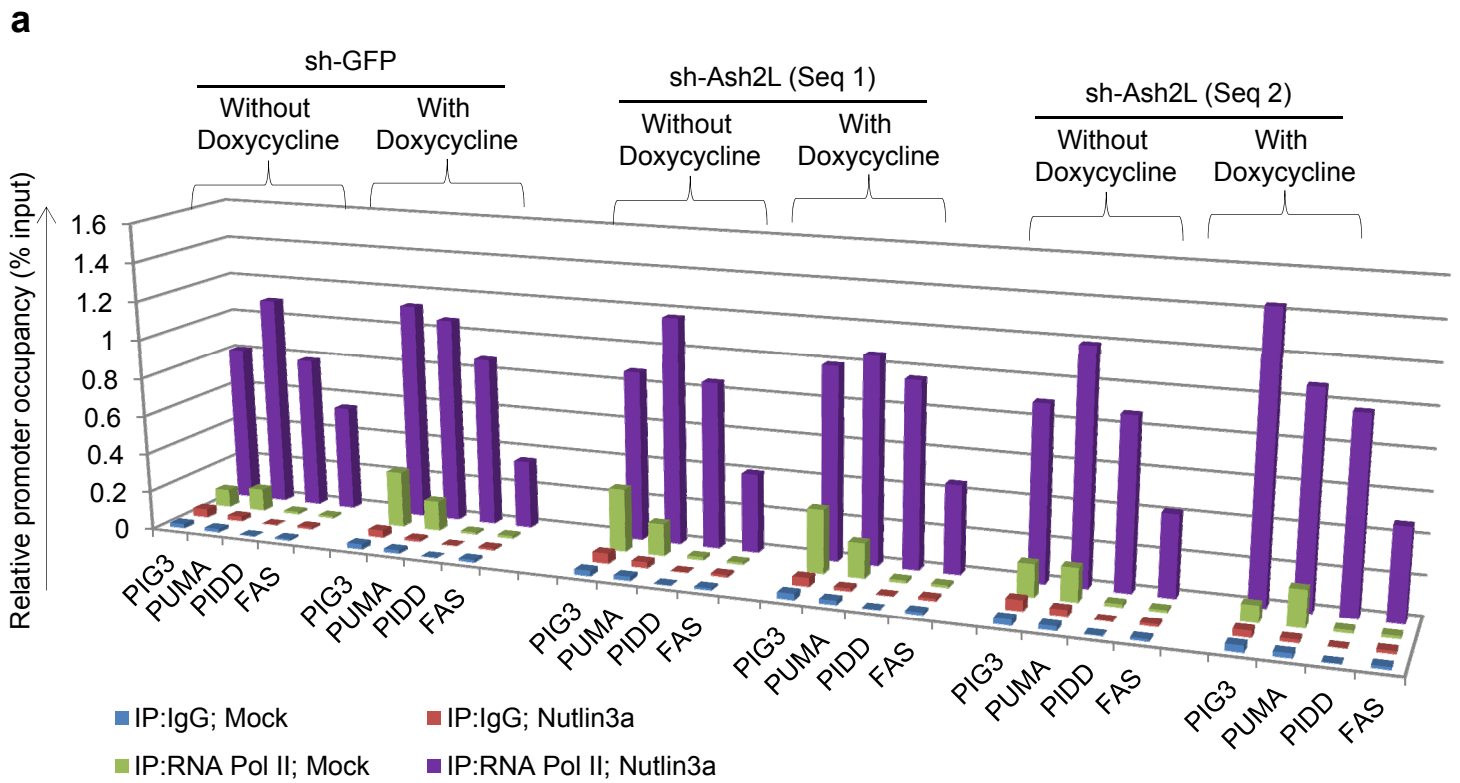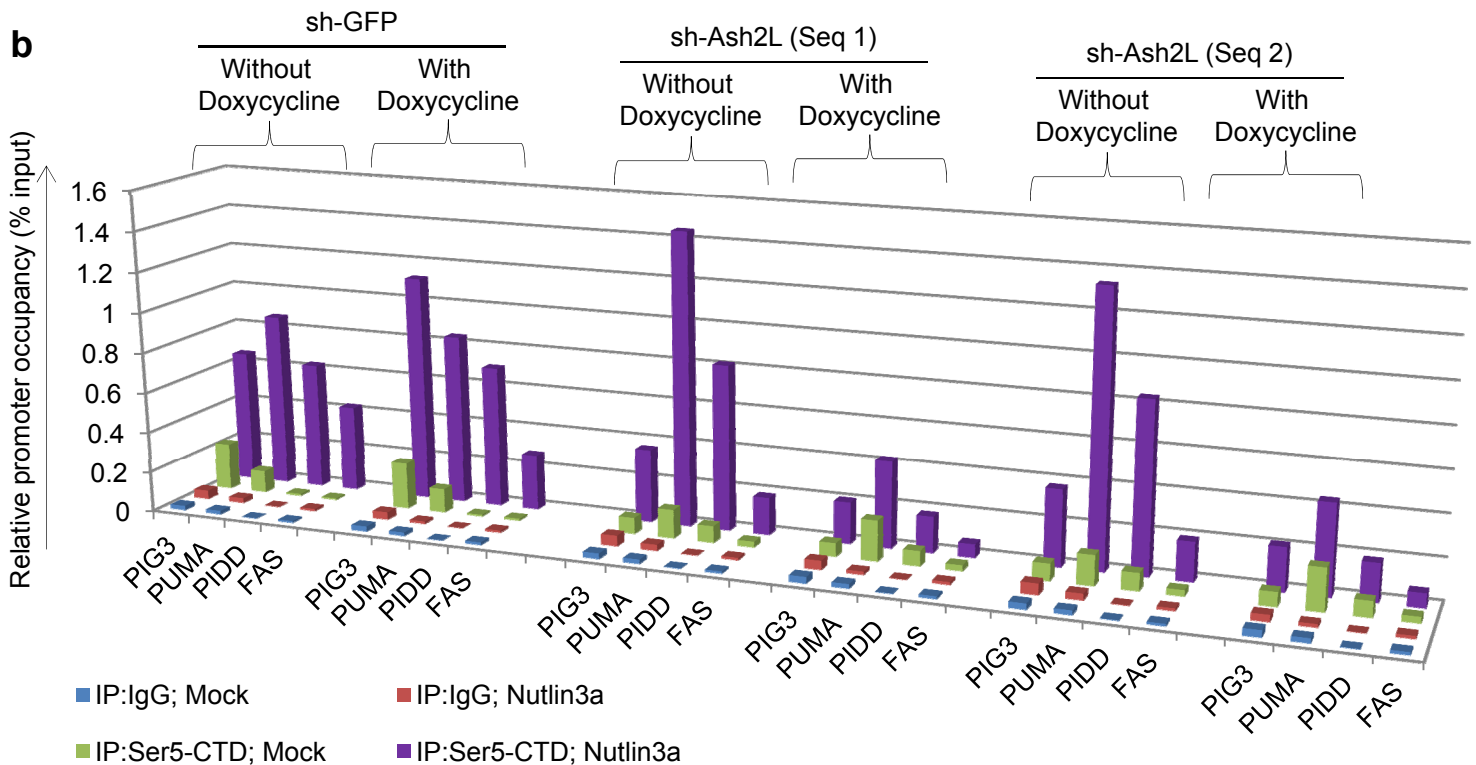

Supplementary Figure 11; Mungamuri et al., 2014

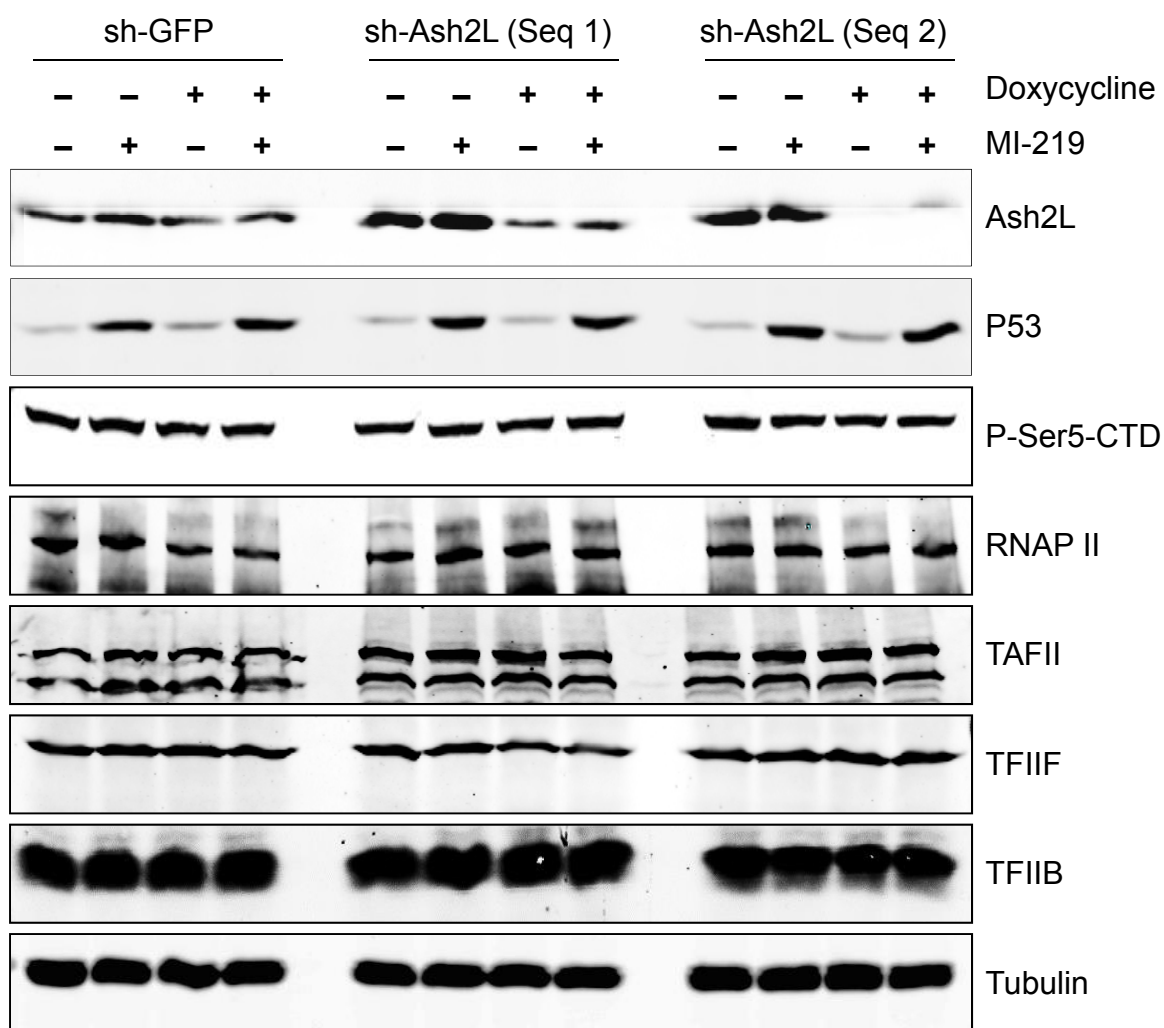

# Supplementary Figure 12; Mungamuri et al., 2014

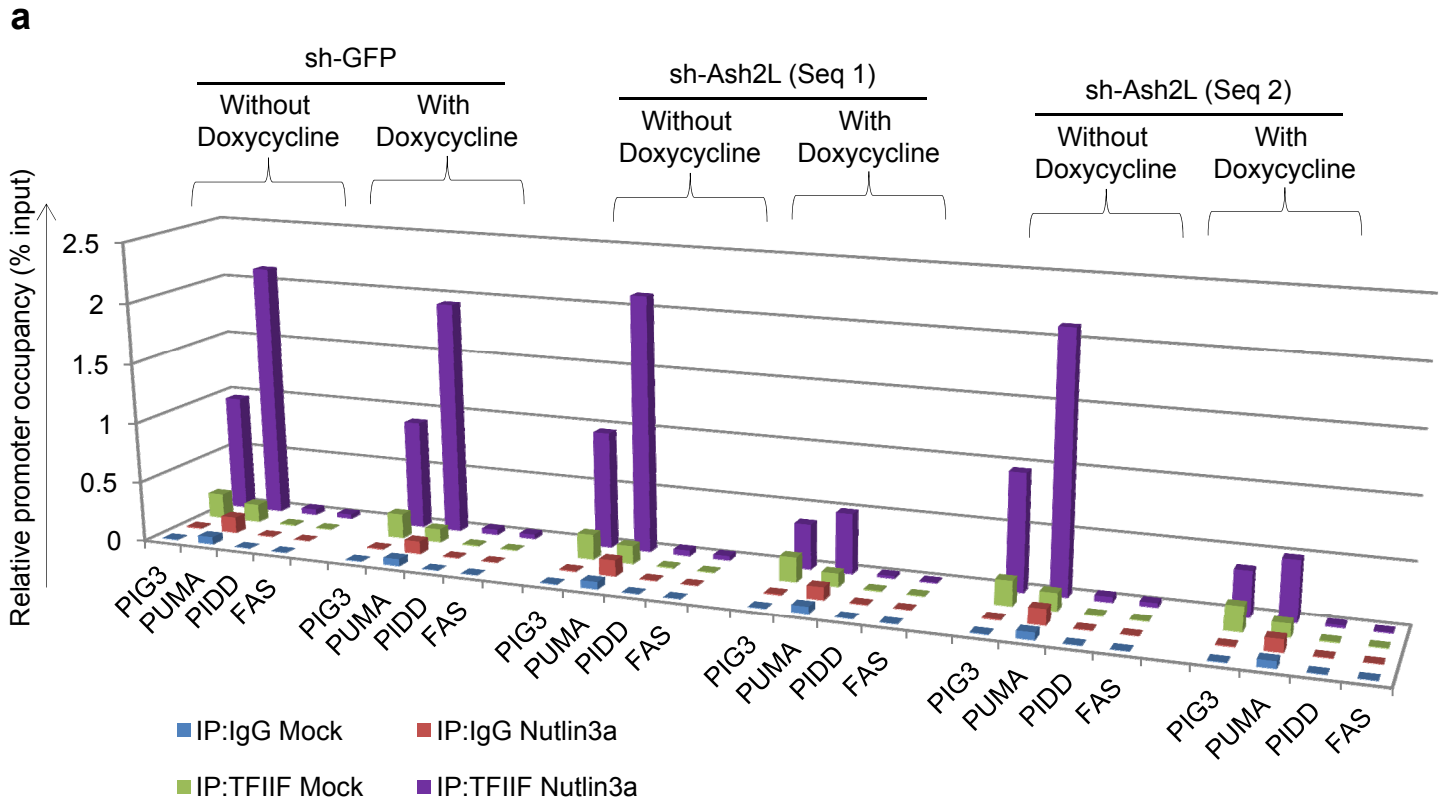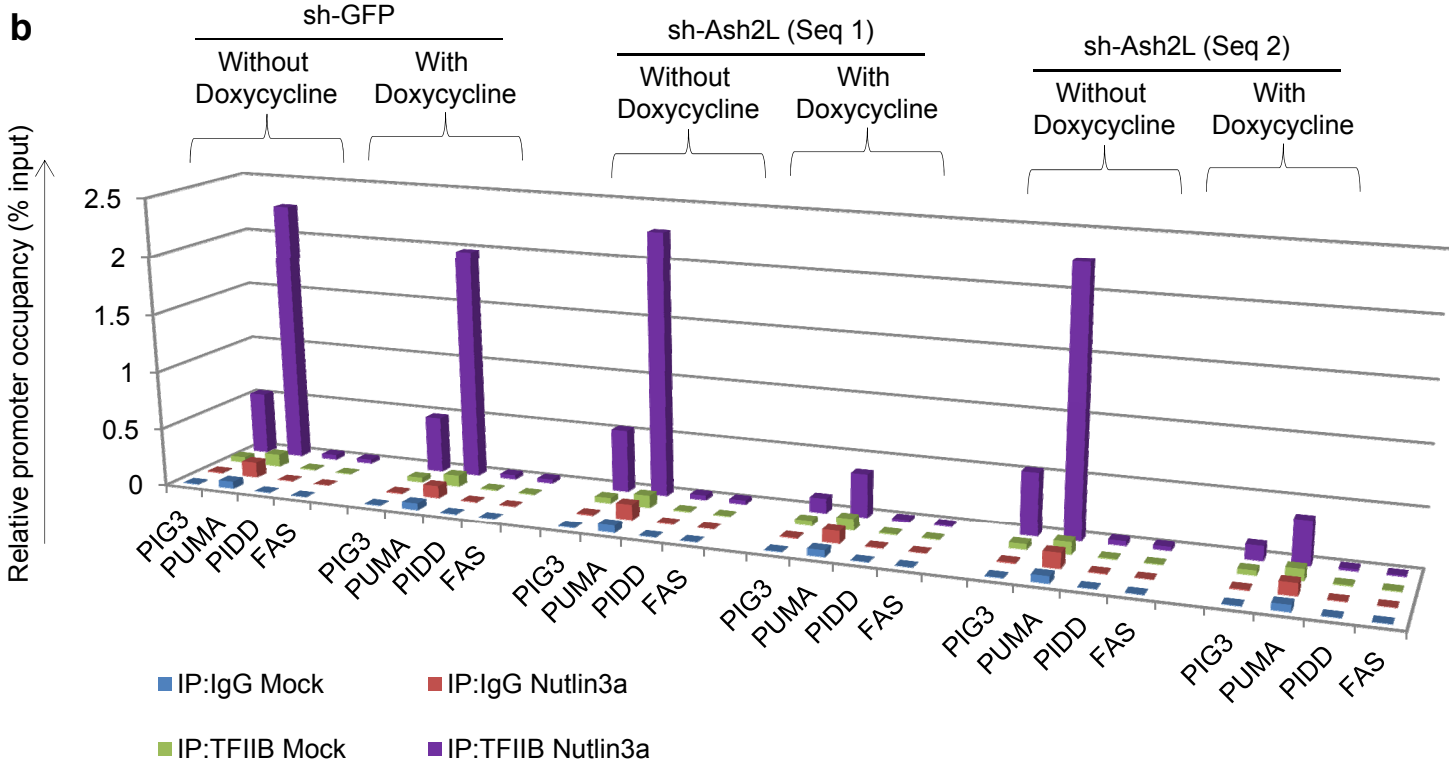

## List of Primers Used in this Study

## For Gene expression (Real time PCR)

| Gene Name | Forward Primer          | Reverse Primer         |
|-----------|-------------------------|------------------------|
| p21       | TGCCGAAGTCAGTTCCTTGT    | CATGGGTTCTGACGGACATC   |
| PUMA      | GACCTCAACGCACAGTACGA    | CACCTAATTGGGCTCCATCT   |
| PIDD      | GCTCTTGCTGTCTCACAACG    | AATCTCAGGAGGTAGCGTGTG  |
| FAS       | TCAGTACGGAGTTGGGGAAG    | TCCTCAATTCCAATCCCTTG   |
| TP53INP1  | TCTCATTGAACATCCCAGCA    | TATGCTGCCCCATTTTCATT   |
| PIG3      | CTCAGTACGTCACGTGCCCC    | GATTAGCACATAGTCTCCAGCC |
| NOXA      | CCGTGTGTAGTTGGCATCTC    | GCACACTCGACTTCCAGCTC   |
| Ash2L     | ATGGCAGTCCCGAACACAG     | GGTTGTCATGCACTCCCAGTAT |
| Wdr5      | CACAAGCTGGGAATATCCGATG  | GGGGATTGAAGTTGCAGCAAAA |
| RbBP5     | TCTGCTCCTGTGTCATGTTGACC | CTCGCCTATCAAAAGATGCCA  |
| DPY30     | GGAGGGACAAACGCAGGTT     | GGTAGGCACGAGTTGGCAA    |
| 18S       | GTAACCCGTTGAACCCCAT     | CCATCCAATCGGTAGTAGCG   |

## For P53 ChIP

| Gene Name | Forward Primer       | Reverse Primer       |
|-----------|----------------------|----------------------|
| p21       | CTGGACTGGGCACTCTTGTC | CCCTTCCTCACCTGAAAACA |
| MDM2      | TCGGGTCAGTGTGAACG    | CACTGAACACAGCTGGGAAA |
| PUMA      | GCGAGACTGTGGCCTTGTGT | CGTTCAGGGTCCACAAAGT  |
| NOXA      | CTCCTCTGCGGTGATTAAGG | GGGAAGGGTTTAACCAGGAG |
| PIG3      | TGCTCCGCGAGGATACAG   | CCACCTTCAGGAGGACTTCA |
| TP53INP1  | AAACCCTCGACCCTTCACTC | CGAGAGGTTGTCACCAACG  |
| FAS       | GAATTGAAGCGGAAGTCTGG | TTAACCCTGCTTCGGTGTCT |
| PIDD      | CATCCAGAGTCCCTGTTTCC | CCGAATCCTCTGAAGCATCT |

## For H3K4me3, Wdr5, RbBP5, Ash2L, RNAP II, Serine5-CTD, TFIIB and TFIIF ChIP

| Gene Name | Forward Primer       | Reverse Primer       |
|-----------|----------------------|----------------------|
| P21       | CCGAAGTCAGTTCCTTGTGG | GTGTCTCGGTGACAAAGTCG |
| PIG3      | GCCCTGTGTCCTCAGACAAT | ATTAAGTCCGCCCGTTTC   |
| PUMA      | AGCCGCCACTGCAGTTAGA  | AGAGGCCGAGGACACTG    |
| NOXA      | CTCCATAACGCCGTCTG    | CGGAGATGCCAACTACACAC |
| FAS       | TCAGTACGGAGTTGGGGAAG | TCCTCAATTCCAATCCCTTG |
| TP53INP1  | GTGCGTTGGTGACAACCTC  | GCCAGTCCAAGTCTTTTGT  |
| PIDD      | GACACACTGGGTGCCTGTC  | GGCAGTTGTGAGACAGCAAG |
