# Supplementary material
Source: PubMed Central journal article supplement (PMC4295002)
Supplement: NIHMS598217-supplement-2.pdf [file NIHMS598217-supplement-2.pdf]

## **Ash2L enables P53–dependent apoptosis by favoring stable transcription pre–initiation complex formation on its pro-apoptotic target promoters**

Sathish Kumar Mungamuri<sup>1</sup>, Shaomeng Wang<sup>2</sup>, James J. Manfredi<sup>1</sup>, Wei Gu<sup>3</sup>, and Stuart A. Aaronson<sup>1</sup>

<sup>1</sup>Department of Oncological Sciences, Icahn School of Medicine at Mount Sinai, New York, NY, USA. <sup>2</sup>University of Michigan Comprehensive Cancer Center, University of Michigan, Ann Arbor, Michigan, USA. <sup>3</sup>Institute for Cancer Genetics, Department of Pathology and Cell Biology, College of Physicians and Surgeons of Columbia University, New York, New York, USA.

### **SUPPLEMENTARY FIGURE LEGENDS**

**Supplementary Fig. 1: Induction of P53 establishes the H3K4me3 histone mark on its target promoters. a, b, c, d, e, f, ChIP analysis showing P53 occupancy (a, b, c) and H3K4me3 enrichment (d, e, f) on P53 target promoters in EJ–P53 cells, 24 h after tetracycline removal from the culture medium (a, d) or in HCT116 cells treated with Nutlin3a for 16 h (b, e) or HCT116 cells treated with 20  $\mu$ M of Etoposide for 24 h (c, f). The target sequences were detected by quantitative real-time PCR analysis of eluted DNA. Relative promoter occupancy over the % input is shown in the form of a bar diagram.**

**Supplementary Fig. 2: SUV39H1 silencing does not induce H3K4me3 mark enrichment or its reader Ash2L occupancy on P53 pro–apoptotic target**

**promoters. a, b,** ChIP analysis showing H3K4me3 enrichment (**a**) or Ash2L occupancy (**b**) on P53 pro-apoptotic target promoters in HCT116 WT cells stably transduced with inducible sh-SUV39H1 and cultured in the presence of doxycycline for the indicated time points. The target sequences were detected by quantitative real-time PCR analysis of eluted DNA. Relative promoter occupancy over the % input is shown in the form of a bar diagram.

**Supplementary Fig. 3: Induction of P53 does not alter the cellular levels of H3K4me3 reader levels. a, b,** Real-time quantitative PCR of EJ-P53 cells induced for p53 for the indicated time points (**a**) or B5/589 cells treated with MI-219 (**b**). mRNA expression levels are normalized to relative levels of 18S RNA. **c, d,** Western blot analysis of EJ-P53 cells induced for p53 for the indicated time points (**c**) or B5/589 cells treated with MI-219 (**d**). Tubulin blot was used as a lysate control.

**Supplementary Fig. 4: Transcriptional Induction of P53 increases H3K4me3 reader's occupancy on P53 target promoters.** ChIP analysis showing Wdr5 (**a**), RbBP5 (**b**) and Ash2L (**c**) occupancy on P53 target promoters in EJ-P53 cells, 24 h after tetracycline removal from the culture medium. The target sequences were detected by quantitative real-time PCR analysis of eluted DNA. Relative promoter occupancy over the % input is shown in the form of a bar diagram.

**Supplementary Fig. 5: DNA damage stabilized P53 increases H3K4me3 reader's occupancy on P53 target promoters.** ChIP analysis showing Wdr5 (**a**), RbBP5 (**b**)

and Ash2L (c) occupancy on P53 target promoters in HCT116 cells treated with 20  $\mu$ M of etoposide for 24 h. The target sequences were detected by quantitative real-time PCR analysis of eluted DNA. Relative promoter occupancy over the % input is shown in the form of a bar diagram.

**Supplementary Fig. 6: Ash2L overexpression enhances P53–dependent apoptosis by enhancing P53–dependent transcription.** a, Propidium iodide (PI) staining of B5/589 cells overexpressing Ash2L and treated with increasing doses of Paclitaxol. The % of cells undergoing apoptosis (less than 2N content of DNA) is shown in the form of a line diagram. b, Real-time quantitative PCR of HCT116 cells overexpressing Ash2L and treated with Nutlin3a for 16 h. mRNA expression levels are normalized to relative levels of 18S RNA.

**Supplementary Fig. 7: Ash2L overexpression enhances P53 occupancy and H3K4me3 enrichment on its pro-apoptotic target promoters, in response to P53 induction.** a, b, ChIP analysis showing P53 occupancy (a) or H3K4me3 enrichment (b) on P53 pro-apoptotic target promoters in HCT116 control or Ash2L overexpressing cells and treated with Nutlin3a for 16 h. The target sequences were detected by quantitative real-time PCR analysis of eluted DNA. Relative promoter occupancy over the % input is shown in the form of bar diagram.

**Supplementary Fig. 8: Ash2L silencing decreases P53–dependent transcription and apoptosis.** a, b, Real-time quantitative PCR (a) and Western blot (b) analysis of

HCT116 cells stably transduced with inducible sh–Ash2L (Sequence 1) and cultured in the presence of doxycycline for 48 h followed by either treating cells with Nutlin3a for 16 h (a) or increasing doses of etoposide for 48 h (b). mRNA expression levels are normalized to relative levels of 18S RNA and tubulin blot was used as a lysate control in the western blot experiments. c, Propidium iodide (PI) staining in B5/589 cells stably transduced with inducible sh–Ash2L. The cells were cultured in the presence of doxycycline for 48 h followed by treatment with increasing doses of Paclitaxol for another 48 h.

**Supplementary Fig. 9: Ash2L silencing does not alter Wdr5 occupancy on P53 pro-apoptotic target promoters in response to P53 induction.** ChIP analysis showing Wdr5 occupancy on P53 pro-apoptotic target promoters in HCT116 cells stably transduced with either inducible sh-GFP or inducible sh–Ash2L (2 sequences) and cultured in the presence of doxycycline for 48 h followed by treating cells with Nutlin3a for 16 h. The target sequences were detected by quantitative real-time PCR analysis of eluted DNA. Relative promoter occupancy over the % input is shown in the form of bar diagram.

**Supplementary Fig. 10: Ash2L silencing alters Ser5–CTD occupancy on P53 target promoters in response to P53 induction.** a, b, ChIP analysis showing RNAP II (a) and Ser5–CTD (b) occupancy on P53 pro–apoptotic target promoters in HCT116 cells stably transduced with either inducible sh-GFP or inducible sh–Ash2L (2 sequences) and cultured in the presence of doxycycline for 48 h followed by treating

cells with Nutlin3a for 16 h. The target sequences were detected by quantitative real-time PCR analysis of eluted DNA. Relative promoter occupancy over the % input is shown in the form of bar diagram.

**Supplementary Fig. 11: Ash2L silencing does not alter cellular levels of GTFs in response to P53 induction.** Western blot analysis of B5/589 cells stably transduced with inducible sh-Ash2L and cultured in the presence of doxycycline for 48 h followed by treating cells with MI-219 for 16 h. Tubulin blot was used as a lysate control.

**Supplementary Fig. 12: Ash2L silencing alters TFIIIF and TFIIIB occupancy on P53 target promoters in response to P53 induction. a, b,** ChIP analysis showing TFIIIF (a) and TFIIIB (b) occupancy on P53 pro-apoptotic target promoters in HCT116 cells stably transduced with either inducible sh-GFP or inducible sh-Ash2L (2 sequences) and cultured in the presence of doxycycline for 48 h followed by treating cells with Nutlin3a for 16 h. The target sequences were detected by quantitative real-time PCR analysis of eluted DNA. Relative promoter occupancy over the % input is shown in the form of bar diagram.

**Supplementary Table 1:** Shows the list of Primer Sequences used in this manuscript.
